# Supplementary material
Source: PubMed Central journal article supplement (PMC1865754)
Supplement: iai_75_5_2189__1.pdf [file iai_75_5_2189__1.pdf]

Supplemental table 1 PCR primers

| Primer | Sequence                                 |
|--------|------------------------------------------|
| P254   | GAGGTATATATTAATGTATCG                    |
| P255   | GATTTAATCTGTATCAGG                       |
| P301   | GGCCATGGGCTGATGCCAGAACTATTA              |
| P304   | CGGAATTCCTCCGCTGCTATTTTC                 |
| P305   | GGCCATGGGCAACGGGTAATAAAGGAG              |
| P308   | CGGAATTCATTACACTTGTACCCACA               |
| P309   | GTCGACGCTACCGCGCCGCTACGAAAAATAACTTCGC    |
| P310   | GGCCGCGGTAGCGTCGACTGACTTAGAATAGCTC       |
| P311   | GTCGACGCTACCGCGCCGCTGCTATTATAAAGTCACTT   |
| P312   | GGCCGCGGTAGCGTCGACTGAGGCATAACCTGATTC     |
| P319   | GGCCATGGGTACTTCAGCCAAAAGGAA              |
| P320   | GGCCATGGGTATGGTCTCAAGGAGTA               |
| P321   | TTTACCCCTCAACTGCT                        |
| P322   | AGCAGTTGAGGGGGTAAAATGAAGAAGATGTTTATG     |
| P325   | CTCCACCTTTCCAGTTAC                       |
| P326   | GTAAGTGGAAAGGTGGAGTATACAAAATATAATGATG    |
| P327   | CACCTTAACGTGTAAGGAT                      |
| P329   | ATTCCATCTGTTGGTAAATA                     |
| P330   | TATTTACCAACAGATGGAATCTGCAACCGTTA         |
| P331   | AGTCATCCCGTAATTTG                        |
| P332   | CAAATTACGGGGATGACTGTCACAAATCAAATC        |
| P333   | ATACCTTTACAGTTAAGGTTGACGGGAAAGAA         |
| P338   | CTCAATTTTACCTTTAGCAC                     |
| P339   | GTGCTAAAGGTAAAATTGAGTATACAAAATATAATGATG  |
| P340   | AACCTTCACTGTAATATGTTG                    |
| P341   | CATTTACAGTGAAGTTGGTGATAAAGAATTATTTACC    |
| P342   | ATTCCAGCGACTGGTCC                        |
| P343   | GGACCAGTCGCTGGAATCTTCAGTCTCTTC           |
| P344   | AGTCATTCTGTCAACTG                        |
| P345   | CAGTTGACAGGAATGACTGTAACCATTAAAAC         |
| P348   | ATGGTCGACGCTACCGC                        |
| P371   | TCTGATGCGCAGAACTATTA                     |
| P372   | CGGAATTCCTCAACGAAAAATAACTTCGCTG          |
| P373   | TTATTTACCCGTTGTATATAA                    |
| P375   | CGGAATTCCTCAGTCATTATAAAGTCACTT           |
| P376   | TTATATACAACGGGTAATAAAGGGGTAAAATGAAGAAGAT |
| P389   | TTCTTTATCACCCACTTTAA                     |
| P390   | GTTAAAGTGGGGTGATAAAGAATACTGGACCAGTC      |
| P391   | TTCTTTCCCGTCAACCTT                       |
| P392   | AAGGTTGACGGGAAAGAATTATTTACCAACAGA        |
| P395   | GTATTCTTTATCACCCACT                      |
| P396   | AGTGGGTGATAAAGAATACTTTACCAACAGATGGA      |
| P397   | CCATAATCTTTATCACCC                       |
| P398   | GGGTGATAAAGAATTATGGACCAACAGATGGAAT       |
| P399   | ACTGGTAAATAATCTTTATC                     |
| P400   | GATAAAGAATTATTTACCAGTAGATGGAATCTTCAGT    |
| P401   | GGTTGACGGGAAAGAATTATGGACCAGTCGCTG        |
| P402   | TAATTCTTTCCCGTCAACC                      |
| P403   | TGACGGGAAAGAATACTTTACCAGTCGCTGGAAT       |
| P404   | AAAGTATCTTTCCCGTCA                       |
| P405   | GAAAGAATACTGGACCAACCGCTGGAATCTGCA        |
| P406   | GTTGGTCCAGTATTTCTTC                      |
| P449   | GACTGAAGATTCATCTAC                       |
| P450   | TTGCAGATTCACGCGGT                        |
| P454   | GGGAGCTCTTTTGTATTGCAGGATGAC              |
| P455   | GGGAGCTCGCGAGCGACTCATAATC                |

Supplemental table 2 Conditions of a two-step PCR

| Name           | First PCR-1  | First PCR-2 | Second PCR |
|----------------|--------------|-------------|------------|
|                | Primer set   | Primer set  | Primer set |
|                | Template     | Template    | Template   |
| pAH-5          | P254-P321    | P322-P255   | P301-P348  |
|                | pi-1         | piiiS-1     | mixture    |
| pCH-6          | P254-P325    | P326-P255   | P301-P348  |
|                | pi-1         | piiiS-1     | mixture    |
| pDH-22         | P254-P327    | P333-P255   | P301-P348  |
|                | pi-1         | piiiS-1     | mixture    |
| pEH-7          | P254-P329    | P330-P255   | P301-P348  |
|                | pi-1         | piiiS-1     | mixture    |
| pFH-5          | P254-P331    | P332-P255   | P301-P348  |
|                | pi-1         | piiiS-1     | mixture    |
| pHH-8          | P254-P338    | P339-P255   | P301-P348  |
|                | pAH-5        | piS-3       | mixture    |
| pNH-3          | P254-P340    | P341-P255   | P301-P348  |
|                | pCH-6        | piS-3       | mixture    |
| pOH-1          | P254-P342    | P343-P255   | P301-P348  |
|                | pDH-22       | piS-3       | mixture    |
| pPH-2          | P254-P344    | P345-P255   | P301-P348  |
|                | pEH-7        | piS-3       | mixture    |
| pYH-2          | P254-P389    | P390-P255   | P301-P348  |
|                | piS-3        | pOH-1       | mixture    |
| pXH-7          | P254-P391    | P392-P255   | P301-P348  |
|                | pOH-1        | piS-3       | mixture    |
| pL29Y-1        | P254-P395    | P396-P255   | P301-P348  |
|                | piS-3        | piS-3       | mixture    |
| pF30W-1        | P254-P397    | P398-P255   | P301-P348  |
|                | piS-3        | piS-3       | mixture    |
| pN32S-1        | P254-P399    | P400-P255   | P301-P348  |
|                | piS-3        | piS-3       | mixture    |
| pY28L-1        | P254-P402    | P401-P255   | P301-P348  |
|                | pAH-5        | pAH-5       | mixture    |
| pW29F-2        | P254-P404    | P403-P255   | P301-P348  |
|                | pAH-5        | pAH-5       | mixture    |
| pS31N-6        | P254-P406    | P405-P255   | P301-P348  |
|                | pAH-5        | pAH-5       | mixture    |
| pStx1(N32S)-1  | P454-P321    | P371-P255   | P320-P372  |
|                | DNA of TS26  | pN32S-1     | mixture    |
| pStx2(S31N)-22 | P455-P373    | P376-P255   | P319-P375  |
|                | DNA of 86-24 | pS31N-6     | mixture    |
